# Supplementary material for: Energy sensing OsSnRK1b and its regulator OsCTK1 promote chilling-induced stomatal closure and chilling tolerance in rice
Source: Research Square preprint supplement (doi:10.21203/rs.3.rs-7447278/v1), 2025-11-12
Supplement: Supplementary file 1 [file f19a00b945eb03c423b0641b.xlsx]

## Sheet: S1
	Table S1 Characterization of the mutants used in this study. Mutations in genes are shown in red. T1 and T2 are CRISPR target sequences used.
	Gene	Mutants	Wild type sequences	Mutants sequences	Predicted impact on target protein
	OsSnRK1	Ossnrk1b-1	T1: TCAAGACGTTGTAAACTTG	T1:TCAAGACGT-----ACTTG	A 5-bp deletion at Target1 leads to a frameshift mutation at amino acid Val300 and premature termination at amino acid 303.
			T2: CGTTGGGTATCCTCAGGCC
		Ossnrk1b-2（Ossnrk1b Ossnrk1c double mutants)	T1: TCAAGACGTTGTAAACTTG	T2: CGTTGGGTATCCTCAG-CC	An 1-bp deletion at Target2 leads to a frameshift mutation at amino acid Gln436 and premature termination at amino acid 440 in OsSnRK1b. A frameshift mutation at amino acid Gln478 and premature termination at amino acid 482 in OsSnRK1c.
			T2: CGTTGGGTATCCTCAGGCC
		Ossnrk1b-3	T1: GCCAAATGAGAAATATGGA	T1T2: TCCT---------676bp-----------ATG	A 676-bp deletion between Target1 and Target2 leads to a frameshift mutation at amino acid Arg54 and premature termination at amino acid 69.
			T2: TTATATGCTGGACCCGAGG
		Ossnrk1b-4	T1: GCCAAATGAGAAATATGGA	T1:GCCAAATGAGAA-TATGGA	An 1-bp deletion at Target1 leads to a frameshift mutation at amino acid Leu48 and premature termination at amino acid 67.
			T2: TTATATGCTGGACCCGAGG
	OsABI5	Osabi5-1	T1: CCACCGGAGGTTGCAAGG	T1: CCACCGTGAGGTTGCAAGG	An 1-bp insertion at Target1 leads to a frameshift mutation at amino acid Thr86 and premature termination at amino acid 107.
		Osabi5-2	T1: ATGAGCAAGAACGTGAAGG	T1: ATGAGCAAGAACGTTGAAGG	An 1-bp insertion at Target1 leads to a frameshift mutation at amino acid Gln10 and premature termination at amino acid 14.
	ZmCTK1	Zmctk1	T1: GGCGATTCGTAGTGGAATC	T1T2: CCAAAG-----198bp--------TTCCACTACGAATCGCC	A 198-bp deletion between Target1 and Target2.
			T2: CCTTGGAATAGGCAAGTTA

## Sheet: S2
	Table S2 Primers in this study.
	Primers for CRISPR/Cas9 2-target vector construction
	Primer	Nucleotide sequence (5'-3')	Notes
	OsSnRK1b-target1-BsF	AATAATGGTCTCAGGCGCAGCGCCTCCGAGAGCAGCT	primers used for the CRISPR/Cas9 2-target vector PHUE411. Ossnrk1b-1 and Ossnrk1b-2 were generated using this construct.
	OsSnRK1b-target1-F0	GCAGCGCCTCCGAGAGCAGCTGTTTTAGAGCTAGAAATAGC
	OsSnRK1b-target2-R0	GTTCTTCTGCAACTTCGACCCGCTTCTTGGTGCC
	OsSnRK1b-target2-BsR	ATTATTGGTCTCTAAACGTTCTTCTGCAACTTCGACC
	OsSnRK1b-Second-target1-BsF	AATAATGGTCTCAGGCGCGTCGCCAAATGAGAAATA	primers used for the CRISPR/Cas9 2-target vector PHUE411. Ossnrk1b-3 and Ossnrk1b-4 were generated using this construct.
	OsSnRK1b-Second-target1-F0	GCGTCGCCAAATGAGAAATAGTTTTAGAGCTAGAAATAGC
	OsSnRK1b-Second-target2-R0	CGGGTCCAGCATATAATTTCGCTTCTTGGTGCC
	OsSnRK1b-Second-target2-BsR	ATTATTGGTCTCTAAACCGGGTCCAGCATATAATTT
	Target1-ZmCK1.1-M1T2-F	CCGGTCTCAGGCGGCGATTCGTAGTGGAATCAGTTTTAGAGCTAGAAATAGC	primers used for the CRISPR/Cas9 2-target vector PHUE411. Zmck1 were generated using this construct.
	Target2-ZmCK1.1-M1T2-R	CCGGTCTCTAAACCTTGGAATAGGCAAGTTATCGCTTCTTGGTGCC
	Primers for genotyping CRISPR/Cas9-generated mutants
	Primer	Nucleotide sequence (5'-3')	Notes
	OsSnRK1b-Target1-F	ATGATATGAGGCTTGTGGAGTA	Genotyping of Ossnrk1b-1, Ossnrk1b-2, Ossnrk1b-3 and Ossnrk1b-4 about the generated mutant alleles.
	OsSnRK1b-Target1-R	TAACTATGACAACAATATTTAGTTGAAT
	OsSnRK1b-Second-Target1-F	AAAAGTGAAGATTGCA
	OsSnRK1b-Second-Target1-R	CATGTGAACCTGAGTCAAT
	OsABI5-Target1-F	ATAGTGAGATGGCATCGG	Genotyping of Osabi5-1 and Osabi5-2 about the generated mutant alleles.
	OsABI5-Target1-R	CCATGGCACCCTTGCAACCTCCGG
	OsABI5-Second-Target1-F	TAGAAAATTTAATAG
	OsABI5-Second-Target1-R	TAGCGGCAAGGAAAATGATC
	Primers for genotyping Arabidopsis T-DNA insertion mutant
	Primer	Nucleotide sequence (5'-3')	Notes
	LB1.3	ATTTTGCCGATTTCGGAAC	Genotyping of Atck1.3
	AtCK1.3-tdna-LP	AGACGATGGTGACATAGCGTC
	AtCK1.3-tdna-RP	TATTGCAGCTAAAAAGCACCG
	AtSnRK1-tdna-LP	ACCACACGTTGGAAACTTTTG	Genotyping of kin10
	AtSnRK1-tdna-RP	ACATGAAGTGCAGATGGGTTC
	AtABI5-tdna-LP	CAATGGAAGTTCGGAATCATG	Genotyping of Atabi5
	AtABI5-tdna-RP	CACTCGTTTTCTTCTTAAAGCG
	Primers for overexpression vectors of OsSnRK1b
	Primer	Nucleotide sequence (5'-3')	Notes
	OE-SnRK1α/NIP-F	TCGCGAGCTCGGTACCATGGAAGGAAATGCTAGA	OsSnRK1b overexpression and overexpression constructs with mutations in the OsSnRK1b phosphorylation site
	OE-SnRK1α/NIP-R	GCCCTTGCTCACCATGGTACCCGATTAAGATTCCTCTCCAATGATTCTTGATAGTCT
	SnRK1αTS-AA-Mid-F	GGCCATTTTTTAAAGACAAGCTGCGGGAGT
	SnRK1αTS-AA-Mid-R	ACTCCCGCATGCTGCCTTTAAAAAATGGCC
	SnRK1αTSS-AAA-Mid-F	CAGACTATCAAGAATCATTGGAGAGGAATCT
	SnRK1αTSS-AAA-Mid-R	AGATTCCTCTCCAATGCTTCTTGATAGTCTG
	OE-SnRK1αTSS-AAA/NIP-F	TCGCGAGCTCGGTACCATGGAAGGAAATGCTAGA
	OE-SnRK1αTSS-AAA/NIP-R	GCCCTTGCTCACCATGGTACCCGATTAAGATTCCTCTCCAATGATTCTTGATAGTCT
	Primers for BiFC, Co-IP and phosphorylation assay.
	Primer	Nucleotide sequence (5'-3')	Notes
	P2YC-OsCTK1-F	CATTTACGAACGATAGTTAATTAAATGGACCGCATCGTC	BiFC assay of OsCTK1 and OsSnRK1b
	P2YC-OsCTK1-R	CACTGCCACCTCCTCCACTAGTATTTGCAGGCGAATC
	P2YN-OsSnRK1b-F	CATTTACGAACGATAGTTAATTAAATGGAAGGAAATGCTAGA
	P2YN-OsSnRK1b-R	ACTGCCACCTCCTCCACTAGTTAGAACCCTCAGTTTGGTAAG
	OsCTK1-Myc-F	TTCGAAATCGATGGATCCTAATGGACCGCATCGTCGGCG	Co-IP assay of OsCTK1 and OsSnRK1b
	OsCTK1-Myc-R	TCGGGGAAATTCGAGCTCTCAATTTGCAGGCGAATCATG
	OsSnRK1b-His-F	GACAGCCCAGATCTGGGTACCATGGAAGGAAATGCTAGA	In vitro phosphorylation assay of OsCTK1 to OsSnRK1b
	OsSnRK1b-His-R	ACGGAGCTCGAATTCGGATCCTAGAACCCTCAGTTTGGTAAG
	OsSnRK1bTSS-AAA-His-F	GACAGCCCAGATCTGGGTACCATGGAAGGAAATGCTAGA
	OsSnRK1bTSS-AAA-His-R	ACGGAGCTCGAATTCGGATCCTAGAACCCTCAGTTTGGTAAG
	OsSnRK1bTS-AA-His-F	GACAGCCCAGATCTGGGTACCATGGAAGGAAATGCTAGA
	OsSnRK1bTS-AA-His-R	ACGGAGCTCGAATTCGGATCCTAGAACCCTCAGTTTGGTAAG
	Primers for gene expression assay
	Primer	Nucleotide sequence (5'-3')	Notes
	OsSnRK1b-RT-F	TGAGGTTGTTCATTCATCCC	qRT-PCR of OsSnRK1b
	OsSnRK1b-RT-R	GCTTTACGTTATACTTTGAATCC
	OsABI5-RT-F	GTAGGTGGGGAGGAGGAA	qRT-PCR of OsABI5
	OsABI5-RT-R	TACCACCTTGGCTTCCTC
	OsActin-RT-F	AGGAAGGCTGGAAGAGGACC	qRT-PCR of internal reference
	OsActin-RT-R	CGGGAAATTGTGAGGGACAT

## Sheet: S3
	Table S3 Vectors used in this study.
	Vector	Use
	pHUE411	CRISPR/Cas9 vector for generating Ossnrk1b mutants
	pUN1301	for OsSnRK1b overexpression in transgenics
	pGEX-2T	for expressing OsCTK1-GST for phosphorylation assays
	pET-30a	for expressing His fusions of OsSnRK1b-His for cell-free and phosphorylation assays
	PAN580	for expressing OsSnRK1b in protoplast
	pCAMBIA1300	for expressing OsCTK1-Myc in Co-IP
	35S-cYFP	for expressing OsCTK1-cYFP in BiFC
	35S-nYFP	for expressing OsSnRK1b-nYFP (HA) in BiFC and Co-IP assay
